# Supplementary material
Source: Springer Nature journal article supplement (https://www.springerprofessional.de/resource/supplementary/13638_2014_1073_MOESM10_ESM.pdf/11899022)

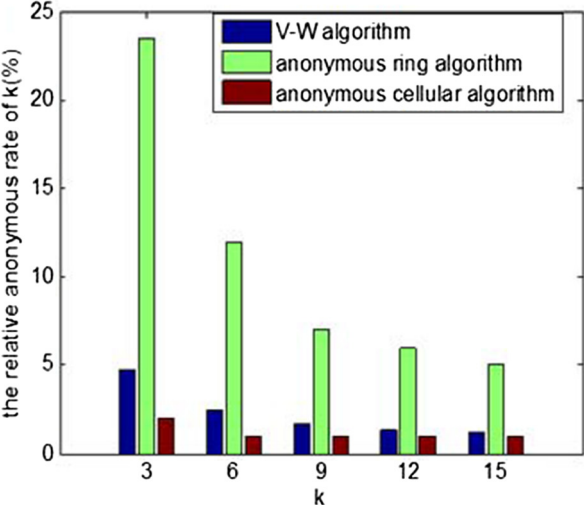

(a)

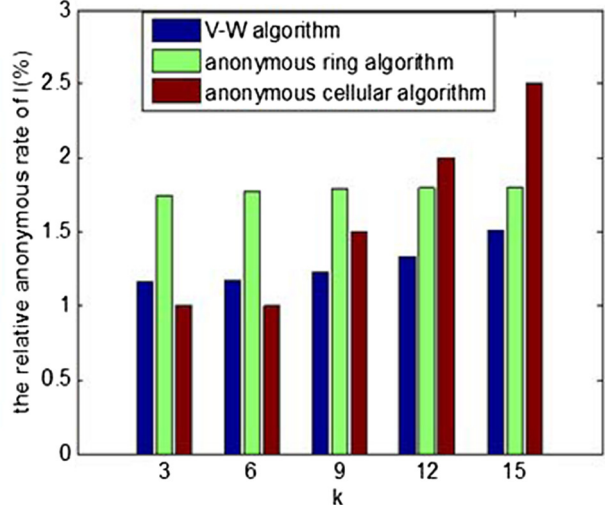

(b)

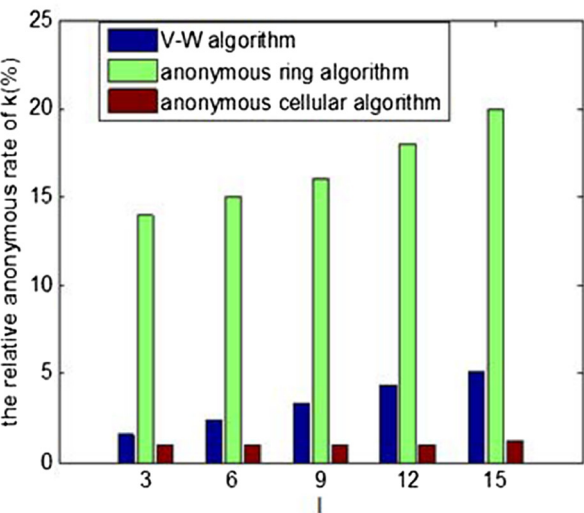

(c)

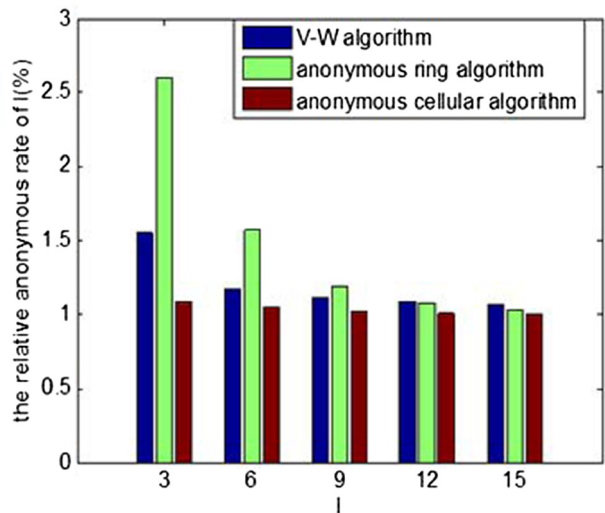

(d)

Supplement: MOESM10 [file 11899022]
